# Supplementary material
Source: Springer Nature journal article supplement (https://www.springermedizin.de/resource/supplementary/13054_2012_619_MOESM8_ESM.pdf/9708790)

MB

ICP 13MMHG

(C)

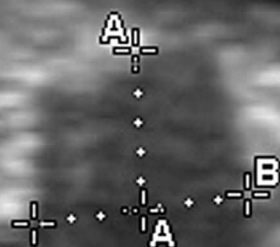

3.3

A 0.30cm

B 0.40cm

Supplement: MOESM8 [file 9708790]
